# Supplementary material for: Impact of COVID-19 pandemic on the management of patients with RA: a survey of rheumatologists in six European countries
Source: PubMed Central journal article supplement (PMC9800854; doi:10.1093/rap/rkac108), 2022-12-13
Supplement: rkac108_supplementary_data.pdf [file rkac108_supplementary_data.pdf]

**Supplementary Table S1:** Questions included in the RA DSP COVID-19 telephone survey, and mode of answer.

| <b>Number</b> | <b>Question</b>                                                                                                                                                                                                                                                                                   | <b>Base</b>                                                                          | <b>Question type</b>                      |
|---------------|---------------------------------------------------------------------------------------------------------------------------------------------------------------------------------------------------------------------------------------------------------------------------------------------------|--------------------------------------------------------------------------------------|-------------------------------------------|
| <b>1</b>      | How has COVID-19 impacted your patient management for rheumatoid arthritis?                                                                                                                                                                                                                       | All physicians                                                                       | Multi-choice                              |
| <b>2</b>      | How has COVID-19 changed the way you prescribe medicine?                                                                                                                                                                                                                                          | All physicians who stated that their prescribing behaviour had changed at question 1 | Multi-choice                              |
| <b>3</b>      | Following the end of lockdown/social distancing do you think...<br><br><ol style="list-style-type: none"> <li>1. Changes in your patient management will continue in case of further outbreaks</li> <li>2. You will revert to previous management patterns</li> <li>3. Other (specify)</li> </ol> | All physicians                                                                       | Single choice                             |
| <b>4</b>      | Following the end of lockdown/social distancing do you think...<br><br><ol style="list-style-type: none"> <li>1. Changes in your prescribing will continue in case of further outbreaks</li> <li>2. You will revert to previous prescribing patterns</li> <li>3. Other (specify)</li> </ol>       | All physicians                                                                       | Single choice                             |
| <b>5</b>      | What proportion of your patients have expressed concerns due to COVID-19 about their treatment regimen?                                                                                                                                                                                           | All physicians                                                                       | Answer as an estimated percentage (0-100) |
| <b>6</b>      | Please describe their concerns                                                                                                                                                                                                                                                                    | Physicians who gave an answer of >0% at question 5                                   | Free text – open ended                    |
| <b>7</b>      | How has COVID-19 impacted on the way you undertake medical education?                                                                                                                                                                                                                             | All physicians                                                                       | Multi-choice                              |

**Supplementary Table S2:** Demographics of rheumatologists who completed the supplemental COVID-19 telephone survey.

|                                         |             | <b>Base</b> | <b>Belgium</b> | <b>France</b> | <b>Germany</b> | <b>Italy</b> | <b>Spain</b> | <b>UK</b> |
|-----------------------------------------|-------------|-------------|----------------|---------------|----------------|--------------|--------------|-----------|
|                                         |             | n=284       | n=10           | n=50          | n=58           | n=59         | n=57         | n=50      |
| Year physician qualified (% physicians) | Before 1983 | 2.8         | -              | 10.0          | -              | 1.7          | -            | 4.0       |
|                                         | 1983-1995   | 23.9        | 40.0           | 42.0          | 34.5           | 16.9         | 19.3         | 4.0       |
|                                         | 1996-2005   | 30.6        | 20.0           | 22.0          | 51.7           | 11.9         | 36.8         | 32.0      |
|                                         | 2006-2016   | 36.6        | 30.0           | 24.0          | 13.8           | 52.5         | 40.4         | 54.0      |
|                                         | After 2016  | 6.0         | 10.0           | 2.0           | -              | 16.9         | 3.5          | 6.0       |
| % patients seen in public hospital      | Mean        | 59.8        | 65.5           | 59.0          | 24.1           | 66.5         | 71.6         | 79.5      |
|                                         | SD          | 41.4        | 43.1           | 41.7          | 43.2           | 33.9         | 30.5         | 32.9      |
| % patients seen in private hospital     | Mean        | 3.0         | 10.0           | 0.7           | -              | 2.5          | 6.2          | 4.4       |
|                                         | SD          | 11.2        | 23.1           | 3.0           | -              | 7.4          | 16.4         | 14.5      |
| % patients seen in public office        | Mean        | 25.2        | 0.5            | 3.4           | 72.3           | 19.2         | 16.3         | 14.3      |
|                                         | SD          | 38.0        | 1.6            | 17.1          | 43.7           | 27.0         | 24.6         | 28.3      |
| % patients seen in private office       | Mean        | 12.0        | 24.0           | 36.8          | 3.5            | 11.7         | 5.9          | 1.8       |
|                                         | SD          | 24.9        | 36.6           | 40.2          | 14.8           | 18.2         | 11.3         | 6.1       |
| % patients seen elsewhere               | Mean        | -           | -              | 0.1           | -              | -            | -            | -         |
|                                         | Min         | -           | -              | -             | -              | -            | -            | -         |

Abbreviations: RA, Rheumatoid Arthritis; SD, Standard Deviation; UK, United Kingdom
